# Supplementary material for: The Prevalence of Depression and Depressive Symptoms among Eye Disease Patients: A Systematic Review and Meta-analysis
Source: PubMed Central journal article supplement (PMC5388862; doi:10.1038/srep46453), 2017-04-12
Supplement: srep46453-s1.pdf [file srep46453-s1.pdf]

# Supplementary information

## Title Page

### **The Prevalence of Depression and Depressive Symptoms among Eye Disease Patients: A Systematic Review and Meta-analysis**

Yajing Zheng\*, Xiaohang Wu\*, Xiaoming Lin<sup>§</sup>, Haotian Lin<sup>§</sup>

**Institution:** State Key Laboratory of Ophthalmology, Zhongshan Ophthalmic Center, Sun Yat-sen University, Guangzhou, Guangdong, 510060, People's Republic of China

\*These authors contributed equally to this work and should be considered co-first authors.

**§Correspondence:** Haotian Lin, M.D., Ph.D., E-mail: haot.lin@hotmail.com; Xiaoming Lin, M.D., Ph.D., E-mail: linxiaom@mail.sysu.edu.cn; Address: Zhongshan Ophthalmic Center, Xian Lie South Road 54#, Guangzhou, China, 510060. Telephone number: +86-020-87330493, Fax: +86-020-87333271.

**Supplementary. Figure S1.**

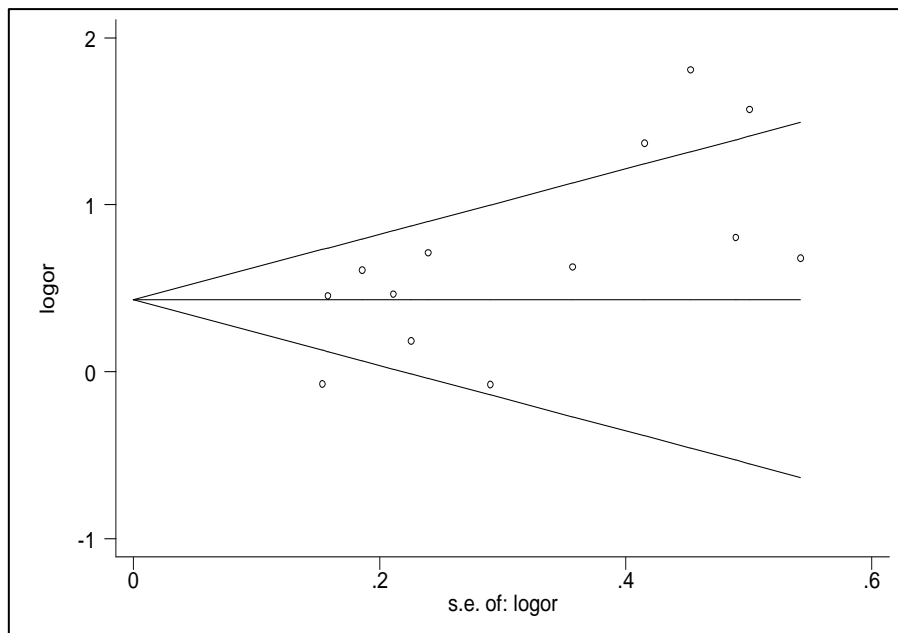

**Supplementary. Figure S1. Funnel plots for publication bias testing of the 13 studies with control groups in meta-analysis.** Each point represents a separate study on the indicated association. The horizontal line represents the mean effect size. The points are distributed asymmetrically, indicating the existence of publication bias.

## **Supplementary. Appendix A. PubMed Search Strategy**

1. ((Depression[Title/Abstract]) OR Depressive symptoms[Title/Abstract])
  
2. ((((((Eye disease[Title/Abstract]) OR Ophthalmology[Title/Abstract]) OR Ocular disorder[Title/Abstract]) OR Dry eye disease[Title/Abstract]) OR Glaucoma[Title/Abstract]) OR Age-related macular degeneration[Title/Abstract]) OR Cataract[Title/Abstract])
  
3. (((Incidence[Title/Abstract]) OR Prevalence[Title/Abstract]) OR Occurrence[Title/Abstract]) OR Rate[Title/Abstract])

Final PubMed search

(1 AND 2) AND (3).
